# Supplementary material
Source: Springer Nature journal article supplement (https://www.springermedizin.de/resource/supplementary/12943_2010_780_MOESM5_ESM.pdf/9554802)

**A**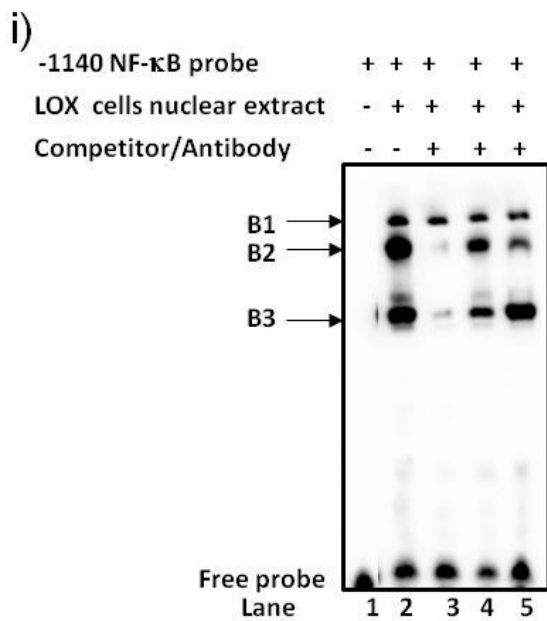**ii)**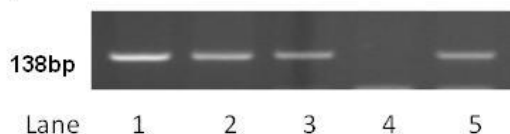**iii)**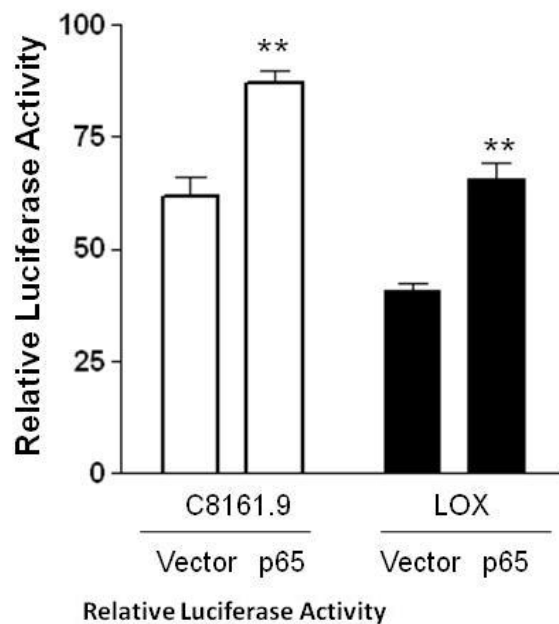**B**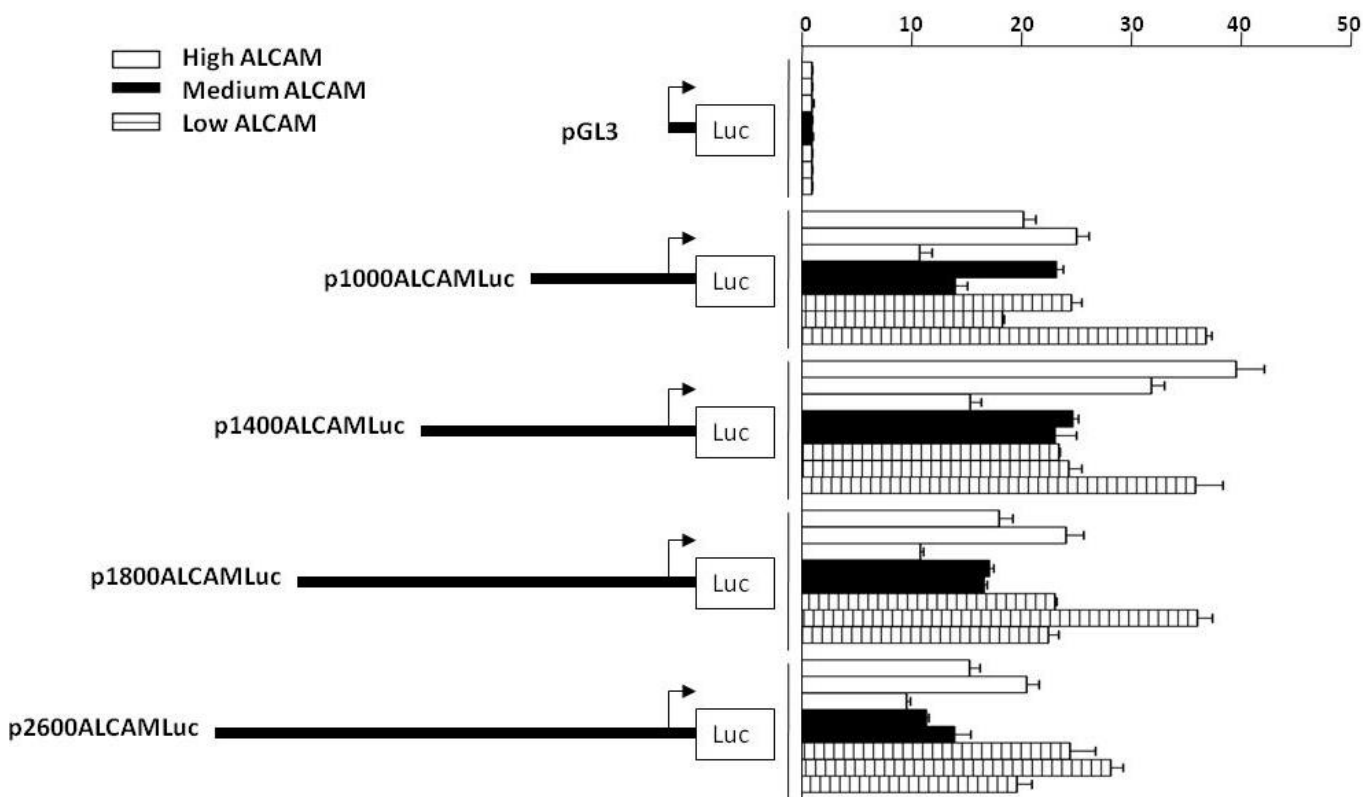

Supplement: MOESM5 [file 9554802]
